# Supplementary material
Source: PubMed Central journal article supplement (PMC10841458)
Supplement: NIHMS1936544-supplement-MMC1.pdf [file NIHMS1936544-supplement-MMC1.pdf]

## **Supplementary Materials and Methods**

### **Phospho antibody array**

Meta4 organoids were treated with either DMSO or Pyrvinium for 24 hours to perform the antibody array covering 227 antibodies was performed using the ERK signaling phospho antibody microarray according to the manufacturer's manual (Full Moon BioSystems). Briefly, protein extraction from organoid was performed using protein extraction buffer containing a 1% protease inhibitor cocktail (Sigma), 1% phosphatase inhibitor cocktail (Sigma), and lysis beads. Extracted protein solution was purified using a gel matrix column. Concentration of the purified protein was measured with Pierce™ BCA protein assay kit (Thermo Fisher Scientific). Protein samples (60 µg) were treated with biotin/N,N-dimethylformamide solution for 90 min and stop reagent for 30 min. The slides were incubated with blocking solution on a shaker at 60 rpm for 30 min at RT. Next, protein samples were mixed into the coupling solution while the slides were washed ten times with high-grade distilled water. The blocked array slides were incubated with coupling mixture for 2 hours RT, and then the slides were washed with washing solution. Alexa Fluor™ 555 - streptavidin (Thermo Fisher Scientific) was mixed in detection buffer, treated to the coupled array slides for 20 min at RT. The slides were washed with washing solution and scanned using a GenePix 4100A scanner (Axon Instrument), and data were analyzed using GenePix 7.0 (Axon Instrument).

### **Flow cytometry**

To obtain single cells, the Meta4 organoids were washed with ice-cold phosphate-buffered saline (PBS) and incubated with Gentle Cell Dissociation buffer (Stemcell Technologies) for 1 hour at 4°C and TrypLE (Gibco) for 5 min at 37°C. Cells were pelleted at 500×g for 5 min, washed with ice-cold Flow Cytometry Staining Buffer (eBioscience), and centrifuged at 500×g for 5 min. Cells were then incubated with fluorescence-conjugated antibodies diluted

in Flow Cytometry Staining Buffer for 30 min at 4°C, washed and resuspended in 1X Annexin-binding buffer. Pacific Blue™ Annexin V (5 µL) and 1 µL of 500 µM SYTOX™ AADvanced™ Dead Cell Stain solution was then added to each 100 µL of cell suspension. All antibodies used for Flow cytometry were listed in Supplementary Table 2. The cells were analyzed using the 5-Laser LSR II (BD Biosciences) in the Vanderbilt Flow Cytometry Shared Resource.

## **Immunostaining**

To prepare formaldehyde-fixed paraffin-embedded (FFPE) organoids, organoids were fixed in 4% paraformaldehyde (PFA) at room temperature (RT) for 30 min. The fixed organoids were embedded in HistoGel™ (Thermo Fisher Scientific) and washed with PBS for 3 min. The samples were then processed using a standard histological protocol for paraffin embedding. Human tissues were fixed in 10% neutral buffered formalin for 1 week at RT and mouse tumor tissues were fixed in 4% PFA overnight at 4°C. The fixed tissues were processed according to a standard histological. Four to five micrometers of organoid or tissue paraffin sections were de-paraffinized in HistoClear solution (Electron Microscopy Services) and rehydrated through a series of ethanol (100%, 95% and 75%). Antigen retrieval was performed using a target retrieval solution (pH6, Dako) in a pressure cooker for 15 min. For immunofluorescence staining, each section was incubated in serum-free protein block solution (Dako) at RT for 1.5 hours. Primary antibodies were diluted in Antibody Diluent with background reducing components (Dako) and applied to sections. After overnight incubation at 4°C, slides were washed in PBS and secondary antibodies diluted in Antibody Diluent (Dako) were applied to each section. Sections were incubated at RT for 1 hour and Hoechst was applied to the sections for 5 min for nuclei counterstaining. All fluorescence images were acquired using a Zeiss Axio Imager M2 microscope with Axiovision digital imaging system or scanned using the Aperio Versa 200 Fluorescent Slide Scanner (Leica) at

the Vanderbilt Digital Histology Shared Resource. Preparation and overlay of fluorescence images were performed using Adobe Photoshop. For immunohistochemical staining, sections were blocked in Peroxidase Blocking Solution (Vector Laboratories) at RT for 20 min followed by serum-free protein block solution (Dako) at RT for 1.5 hours. Primary antibodies were diluted in Antibody Diluent with background reducing components (Dako) and applied to sections, then incubated overnight at 4°C. Horseradish-peroxidase-conjugated secondary antibodies were applied to sections and incubated for 15 min at RT followed by washes in PBS. ImmPRESS polymer detection reagent and ImmPACT DAB substrate kits (Vector Laboratories) were used for antibody detection. Images were scanned on a SCN400 slide scanner (Leica) at 20x magnification. All primary and secondary antibodies used for immunostaining are listed in Supplementary Table 2.

## Supplementary Tables

**Supplementary Table 1. Clinicopathological information of gastric cancer patient organoids**

| Organoids | Gender | Age | Lauren     | WHO                      | T    | N   | M  | Stage | MSI/MSS |
|-----------|--------|-----|------------|--------------------------|------|-----|----|-------|---------|
| hPCO-1    | M      | 50  | intestinal | MD                       | cT2  | N0  | M0 | IA    | MSS     |
| hPCO-2    | F      | 81  | diffuse    | SRCC                     | cT4a | N3b | M0 | IIIC  | MSS     |
| hPCO-3    | M      | 51  | diffuse    | Mixed<br>(PCC90%+PD10%)  | T1a  | N0  | M0 | IA    | unknown |
| hPCO-5    | F      | 77  | diffuse    | Mixed<br>(SRCC70%+PD30%) | T4b  | N3a | M0 | IIIC  | MSS     |
| hPCO-7    | F      | 75  | intestinal | PD                       | T1a  | N0  | M0 | IA    | unknown |
| hPCO-8    | F      | 75  | intestinal | PD                       | T1a  | N0  | M0 | IA    | unknown |
| hPCO-9    | F      | 75  | intestinal | PD                       | T1a  | N0  | M0 | IA    | unknown |
| hPCO-10   | F      | 75  | intestinal | PD                       | T1a  | N0  | M0 | IA    | unknown |
| hPCO-11   | F      | 75  | intestinal | PD                       | T1a  | N0  | M0 | IA    | unknown |
| hPCO-12   | F      | 75  | intestinal | PD                       | T1a  | N0  | M0 | IA    | unknown |
| hPCO-13   | M      | 57  | intestinal | MD                       | T4a  | N1  | M0 | IIIA  | MSS     |
| hPCO-14   | M      | 57  | intestinal | MD                       | T4a  | N1  | M0 | IIIA  | MSS     |
| hPCO-15   | M      | 57  | intestinal | MD                       | T4a  | N1  | M0 | IIIA  | MSS     |
| hPCO-18   | F      | 69  | intestinal | MD                       | T3   | N0  | M0 | IIA   | MSI     |
| hPCO-19   | M      | 59  | diffuse    | SRCC                     | T4a  | N3a | M0 | IIIB  | MSS     |
| hPCO-25   | M      | 58  | intestinal | MD(MC 30%)               | T4a  | N3a | M0 | IIIB  | MSI     |
| hPCO-27   | M      | 58  | intestinal | WD                       | T1a  | N0  | M0 | IA    | unknown |
| hPCO-28   | M      | 70  | intestinal | MD                       | T1a  | N0  | M0 | IA    | unknown |
| hPCO-31   | M      | 70  | intestinal | MD                       | T1a  | N0  | M0 | IA    | unknown |
| hPCO-34   | M      | 50  | intestinal | MD                       | T1a  | N0  | M0 | IA    | unknown |

\* MD; Moderate differentiation, PD; poorly differentiation, PCC; poorly cohesive carcinoma, SRCC; signet ring cell carcinoma,

MC; Micropapillary Carcinoma

**Supplementary Table 2. Sequences of Primers**

| <b>Gene</b>   | <b>Forward primer (5'-3')</b> | <b>Reverse primer (5'-3')</b> |
|---------------|-------------------------------|-------------------------------|
| <i>Axin2</i>  | ATGGAGTCCCTCCTTACCGCAT        | GTTCCACAGGCGTCATCTCCTT        |
| <i>LGR5</i>   | AGAGCCTGATACCATCTGCAAAC       | TGAAGGTCGTCCACACTGTTGC        |
| <i>ZNRF3</i>  | CTCATCGGTTCCACAGGAAGTG        | CGTGTAAGGTTGCTTGTCTCCAC       |
| <i>RNF43</i>  | CTGGCTATACCAGCATCGGACT        | ATGCTGGCGAATGAGGTGGAGT        |
| <i>CDCA4</i>  | AGCGACAGTCACTCCTGGACAT        | CACACCATCCTGGCTCATTTC         |
| <i>EPHB3</i>  | CCTGTGTCAAGATCGAGGAGGT        | CTTCAGCGTCTTGATAGCCACG        |
| <i>SP5</i>    | TCGTGTGCAACTGGCTCTTCTG        | AGGTGATCGCTTCGCATGAAGC        |
| <i>Ccnd</i>   | GCAGAAGGAGATTGTGCCATCC        | AGGAAGCGGTCCAGGTAGTTCA        |
| <i>Ccnb</i>   | AGAGGTGGAACCTTGCTGAGCCT       | GCACATCCAGATGTTTCCATCGG       |
| <i>Cdk1</i>   | CATGGACCTCAAGAAGTACCTGG       | CAAGTCTCTGTGAAGAACTCGCC       |
| <i>Cdkn1a</i> | TCGCTGTCTTGCACTCTGGTGT        | CCAATCTGCGCTTGAGTGATAG        |
| <i>Myc</i>    | TCGCTGCTGTCTCCGAGTCC          | GGTTTGCCTCTTCTCCACAGAC        |
| <i>Pim1</i>   | CGCGACATCAAGGACGAGAACA        | CGAATCCACTCTGGAGGACTGT        |
| <i>Jun</i>    | CAGTCCAGCAATGGGCACATCA        | GGAAGCGTGTTCTGGCTATGCA        |
| <i>Fos</i>    | GGGAATGGTGAAGACCGTGTC         | GCAGCCATCTTATTCCGTTCCC        |
| <i>Bcl2l1</i> | GCCACCTATCTGAATGACCACC        | AGGAACCAGCGGTTGAAGCGC         |
| <i>Bcl2</i>   | CCTGTGGATGACTGAGTACCTG        | AGCCAGGAGAAATCAAACAGAGG       |
| <i>Mcl1</i>   | AGTTCATCGAACCATTAGCAGAA       | CCTTCTAGGTCTGTACGTGGA         |
| <i>Birc5</i>  | CCTACCGAGAACGAGCCTGATT        | CCATCTGCTTCTTGACAGTGAGG       |
| <i>P53</i>    | ACCGCCGACCTATCCTTACC          | TCTTCTGTACGGCGGTCTCTC         |
| <i>Vegf</i>   | CTGCTGTAACGATGAAGCCCTG        | GCTGTAGGAAGTCTATCTCTCC        |
| <i>Hif1a</i>  | CCTGCACTGAATCAAGAGGTTGC       | CCATCAGAAGGACTTGCTGGCT        |
| <i>CD133</i>  | CTGCGATAGCATCAGACCAAGC        | CTTTTGACGAGGCTCTCCAGATC       |
| <i>CD166</i>  | AGGAACATGGCGGCTTCAACGA        | ACACCACAGTCGCGTTTCCACT        |
| <i>Slfn4</i>  | AGGAATGGGTGAAGCGCCAGAT        | CAACCAGTGTTCCTTTACGCAGG       |
| <i>Itgam</i>  | TACTTCGGGCAGTCTCTGAGTG        | ATGGTTGCCTCCAGTCTCAGCA        |
| <i>Nos2</i>   | GAGACAGGGAAGTCTGAAGCAC        | CCAGCAGTAGTTGCTCCTCTTC        |
| <i>Arg1</i>   | CATTGGCTTGCGAGACGTAGAC        | GCTGAAGGTCTTCCATCACC          |

**Supplementary Table 3. Reagents and resources**

| <b>Primary antibodies</b>                                                              | <b>Species</b> | <b>Vender</b>             | <b>Catalog#</b> |
|----------------------------------------------------------------------------------------|----------------|---------------------------|-----------------|
| CD44v9 for mouse (1:25000)                                                             | Rat            | Cosmo Bio Co. LTD.        | LKG-M002        |
| Trop2 for mouse (1:500)                                                                | Goat           | R&D Systems               | AF1122          |
| Ki-67 (1:500)                                                                          | Rat            | Abcam                     | ab16667         |
| UEA1(1:2000)                                                                           | Conjugtae      | Vector                    | FL-1061         |
| H/K-ATPase (1:10000)                                                                   | Mouse          | Fitzgerald                | 10R-H100b       |
| CD44v9 for human (1:15000)                                                             | Rat            | Cosmo Bio Co. LTD         | LKG-M001        |
| Trop2 for human (1:500)                                                                | Goat           | R&D systems               | AF650           |
| AQP5 (1:500)                                                                           | Rabbit         | Sigma                     | HPA065008       |
| GAPDH (1:10000)                                                                        | mouse          | Cell signaling technology | 97166S          |
| phospho-STAT3 for IHC (1:2000)                                                         | Rabbit         | Abclonal                  | AP1320          |
| Pim1 (1:2000)                                                                          | Rabbit         | Abclonal                  | A19695          |
| CD25(1:250)                                                                            | Mouse          | Novus Bio                 | AF2438-sp       |
| CD4 (1:1000)                                                                           | Rabbit         | Abcam                     | ab183685        |
| CD8 (1:1000)                                                                           | Mouse          | Santacruz                 | sc-1181         |
| CD19 (1:1000)                                                                          | Mouse          | Santacruz                 | sc-373897       |
| CD3 (1:2000)                                                                           | Rabbit         | Abcam                     | ab5690          |
| NK1.1(1:250)                                                                           | Mouse          | Invitrogen                | MAI-70100       |
| CD163(1:500)                                                                           | Rabbit         | Proteintech               | 16646-1-AP      |
| CD68 (1:200)                                                                           | Mouse          | SantaCruz                 | sc-20060        |
| phospho-STAT3 (Y705) for WB (1:3000)                                                   | Rabbit         | Cell signaling technology | 9145S           |
| phospho-STAT3 (S727) for WB (1:3000)                                                   | Rabbit         | Cell signaling technology | 9143S           |
| total-STAT3 (1:3000)                                                                   | Rabbit         | Cell signaling technology | 4904S           |
| phospho-ERK (1:3000)                                                                   | Rabbit         | Cell signaling technology | 4370            |
| tERK (1:3000)                                                                          | Rabbit         | Cell signaling technology | 4695            |
| Tubulin (1:10000)                                                                      | Rabbit         | Sigma                     | T5168           |
| Cyclin B1 (1:1000)                                                                     | Rabbit         | Abclonal                  | A16800          |
|                                                                                        |                |                           |                 |
| <b>Secondary antibodies</b>                                                            |                | <b>Vender</b>             | <b>Catalog#</b> |
| Donkey anti-Rat IgG (H+L) Highly CrossAdsorbed Secondary Antibody, Alexa Fluor 594     |                | ThermoFisher              | A-21209         |
| Donkey anti-Rabbit IgG (H+L) Highly Cross-Adsorbed Secondary Antibody, Alexa Fluor 488 |                | ThermoFisher              | A-21206         |
| Donkey anti-Goat IgG (H+L) CrossAdsorbed Secondary Antibody, Alexa Fluor 647           |                | ThermoFisher              | A-21447         |
| Donkey anti-Rat IgG (H+L) CrossAdsorbed Secondary Antibody, DyLight 650                |                | ThermoFisher              | SA5-10041       |
| Donkey anti-Mouse IgG (H+L) Highly Cross-Adsorbed Secondary Antibody, Alexa Fluor 555  |                | ThermoFisher              | A-31570         |
| Anti-Mouse IgG (H+L), HRP Conjugate                                                    |                | Promega                   | W402B           |
| Anti-Rabbit IgG (H+L), HRP Conjugate                                                   |                | Promega                   | W401B           |
| Streptavidin, Alexa Fluor™ 555 conjugate                                               |                | Invitrogen                | S21381          |
|                                                                                        |                |                           |                 |
| <b>Fluorescence-conjugated antibodies for FACS</b>                                     |                | <b>Vender</b>             | <b>Catalog#</b> |
| Alexa Fluor 647 anti-mouse CD133                                                       |                | Biolegend                 | 141216          |
| Fluorescein-conjugated anti-mouse ALCAM/CD166                                          |                | R&D systems               | FAB1172F        |
|                                                                                        |                |                           |                 |
| <b>Chemicals and Recombinant Proteins</b>                                              |                | <b>Vender</b>             | <b>Catalog#</b> |
| SuperSignal™ West Femto Maximum Sensitivity Substrate                                  |                | ThermoFisher              | 34096           |
| Blotting-Grade Blocker                                                                 |                | Bio-Rad                   | 170-6404        |
| Tween20                                                                                |                | Sigma                     | P4916           |
| 10xTBS                                                                                 |                | corning                   | 46-012-CM       |
| Ponceau                                                                                |                | Sigma                     | P7170           |
| 10xSDS/Tris/glycine                                                                    |                | Bio-Rad                   | 1610772         |
| 10xTris/glycine                                                                        |                | Bio-Rad                   | 1610771         |
| Dual color protein Ladder                                                              |                | Bio-Rad                   | 1610374         |

|                                                                            |                             |                 |
|----------------------------------------------------------------------------|-----------------------------|-----------------|
| ReBlot PluReBlot Plus Strong Antibody Stripping Solution, 10x              | Merck                       | 2504            |
| 4% paraformaldehyde solution in PBS                                        | Fisher Scientific           | AAJ19943K2      |
| Histoclear                                                                 | National Diagnostics        | HS-200          |
| Hoechst, 33242                                                             | Invitrogen                  | 62249           |
| Dimethyl sulfoxide (DMSO)                                                  | Sigma                       | D2650           |
| IntestiCult™ Organoid Growth Medium (Mouse)                                | STEMCELL technologies       | 06005           |
| IntestiCult™ Organoid Growth Medium (Human)                                | STEMCELL technologies       | 06010           |
| Matrigel® Growth Factor Reduced (GFR) Basement Membrane Matrix             | Corning                     | 356231          |
| Cultrex® Reduced Growth Factor Basement Membrane Extract, Type R1          | R&D systems                 | 3433-005-R1     |
| Y-27632                                                                    | MedChemExpress              | HY-10583        |
| MycoZap Plus PR                                                            | Lonza                       | VZA-2021        |
| Penicillin/streptomycin                                                    | Gibco                       | 15140122        |
| 10xPBS                                                                     | Corning                     | 21-040-CV       |
| ProLong Gold Antifade Mountant                                             | ThermoFisher                | P36934          |
| Trizol                                                                     | Ambionlife technologies     | 15596026        |
| Pyruvium pamoate                                                           | MedChemExpress              |                 |
| HistoGel™                                                                  | ThermoFisher                | HG-4000-012     |
| Target retrieval solution (pH 6)                                           | Dako                        | S1699           |
| Protein Block, Serum-Free                                                  | Dako                        | X0909           |
| Antibody Diluent, Background Reducing                                      | Dako                        | S3022           |
| Antibody Diluent                                                           | Dako                        | S0809           |
| BLOXALL® Endogenous Blocking Solution, Peroxidase and Alkaline Phosphatase | Vector Laboratories         | SP-6000         |
| ImmPRESS® HRP Horse Anti-Rabbit IgG Polymer Detection Kit, Peroxidase      | Vector Laboratories         | MP-7401         |
| ImmPACT® DAB Substrate, Peroxidase (HRP)                                   | Vector Laboratories         | SK-4105         |
| Advanced DMEM/F12                                                          | Gibco                       | 12634-010       |
| Fetal Bovine Serum (FBS)                                                   | PEAK Serum                  | PS-FB1          |
| Trametinib                                                                 | MedChemExpress              |                 |
| CalceinAM                                                                  | Invitrogen                  | C1430           |
| EthD-1                                                                     | Invitrogen                  | E1169           |
| SSTC                                                                       | MedChemExpress              |                 |
| RIPA buffer                                                                | Sigma                       | R0278           |
| 4x Laemmli Sample Buffer                                                   | Bio-Rad                     | 1610747         |
| eBioscience™ Flow Cytometry Staining Buffer                                | Invitrogen                  | 00-4222-26      |
| GoScript™ Reverse Transcriptase (Mix+Random Primers)                       | Promega                     | A2801           |
| Xylene                                                                     | Supelco                     | 108297          |
| Tamoxifen                                                                  | Sigma                       | T2859           |
| Corn oil                                                                   | Sigma                       | C8267           |
| <b>Commercial Assay kits</b>                                               | <b>Vender</b>               | <b>Catalog#</b> |
| iTaq Universal SYBR Green Supermix                                         | Bio-Rad                     | 1725121         |
| iScript™ gDNA Clear cDNA Synthesis Kit                                     | Bio-Rad                     | 1725035         |
| Antibody array assay kit                                                   | Full moon bio               | KAS02           |
| Erk-phospho antibody array kit                                             | Full moon bio               | PEK208          |
| PIPseq™ T2 3' Single Cell RNA Kit v4.0                                     | FluentBio                   |                 |
| Pierce™ BCA Protein Assay Kit                                              | Thermo Scientific           | 23227           |
| RNeasy FFPE Kit                                                            | Qiagen                      | 73504           |
| <b>Software and Algorithms</b>                                             | <b>Vender</b>               | <b>Catalog#</b> |
| Amersham™ Imager 600                                                       | GE Healthcare Life Sciences |                 |
| EVOS M7000                                                                 | ThermoFisher                | 2.0.2094.0      |
| GraphPad Prism                                                             | GraphPad Software           | Version 9.0.2   |
| AxioVision SE64                                                            | Zeiss                       | versuin 4.9.1   |
| PartekFlow                                                                 | Partek                      |                 |
| Biorender                                                                  |                             |                 |
| FlowJo                                                                     | BD Biosciences              | Version 10.7.2  |
| CFX Maestro                                                                | Bio-Rad                     |                 |
| StepOnePlus software version 2.3                                           | Applied Biosystems          |                 |
